# Supplementary material
Source: PubMed Central journal article supplement (PMC7964624)
Supplement: 3112_tables.pdf [file 3112_tables.pdf]

**On-line Table 1: Lesion number and volume by disease group according to CCSVI status in which CCSVI-borderline cases were classified in the CCSVI-negative group**

|                              | HC            |               |          | RRMS          |               |          | SPMS          |               |          |
|------------------------------|---------------|---------------|----------|---------------|---------------|----------|---------------|---------------|----------|
|                              | CCSVI         | No CCSVI      | <i>P</i> | CCSVI         | No CCSVI      | <i>P</i> | CCSVI         | No CCSVI      | <i>P</i> |
| Number of lesions            |               |               |          |               |               |          |               |               |          |
| T2                           |               |               |          |               |               |          |               |               |          |
| Mean (SD)                    | 12.37 (17.89) | 10.72 (10.39) | .55      | 34.43 (20.39) | 29.40 (19.45) | .05      | 36.82 (20.67) | 41.88 (28.40) | .76      |
| <i>n</i>                     | 19            | 54            |          | 81            | 81            |          | 50            | 16            |          |
| T1                           |               |               |          |               |               |          |               |               |          |
| Mean (SD)                    | –             | –             | –        | 12.93 (12.48) | 12.47 (12.88) | .90      | 18.39 (14.54) | 17.14 (17.04) | .45      |
| <i>n</i>                     | 0             | 0             |          | 72            | 78            |          | 46            | 14            |          |
| Gd                           |               |               |          |               |               |          |               |               |          |
| Mean (SD)                    | –             | –             | –        | 0.37 (1.05)   | 0.51 (3.37)   | .17      | .07 (0.25)    | 0 (0)         | .35      |
| <i>n</i>                     | 0             | 0             |          | 70            | 75            |          | 46            | 13            |          |
| Total volume of lesions (ml) |               |               |          |               |               |          |               |               |          |
| T2                           |               |               |          |               |               |          |               |               |          |
| Mean (SD)                    | 2.67 (3.84)   | 1.70 (2.03)   | .71      | 13.11 (16.38) | 13.75 (16.03) | .82      | 22.75 (19.85) | 23.86 (23.74) | .83      |
| <i>n</i>                     | 19            | 54            |          | 81            | 81            |          | 50            | 16            |          |
| T1                           |               |               |          |               |               |          |               |               |          |
| Mean (SD)                    | –             | –             | –        | 2.38 (3.62)   | 3.89 (8.98)   | .66      | 6.39 (8.32)   | 5.52 (9.72)   | .60      |
| <i>n</i>                     | 0             | 0             |          | 72            | 78            |          | 46            | 14            |          |
| Gd                           |               |               |          |               |               |          |               |               |          |
| Mean (SD)                    | –             | –             | –        | 0.06 (0.21)   | 0.06 (0.37)   | .16      | 0.006 (0.03)  | 0 (0)         | .35      |
| <i>n</i>                     | 0             | 0             |          | 70            | 75            |          | 46            | 13            |          |

**Note:**—The differences between lesion volumes in subjects with and without CCSVI were calculated using the cube root of the total volume by applying the Student *t* test. The lesion volumes are expressed in ml. Gd indicates gadolinium.

**On-line Table 2: Lesion number and volume by disease group according to CCSVI status in which CCSVI-borderline cases were classified in the CCSVI-positive group**

|                              | HC            |               |          | RRMS          |               |          | SPMS          |               |          |
|------------------------------|---------------|---------------|----------|---------------|---------------|----------|---------------|---------------|----------|
|                              | CCSVI         | No CCSVI      | <i>P</i> | CCSVI         | No CCSVI      | <i>P</i> | CCSVI         | No CCSVI      | <i>P</i> |
| Number of lesions            |               |               |          |               |               |          |               |               |          |
| T2                           |               |               |          |               |               |          |               |               |          |
| Mean (SD)                    | 11.60 (15.60) | 10.92 (10.99) | .97      | 33.55 (19.48) | 29.20 (20.78) | .04      | 36.38 (20.27) | 44.85 (30.58) | .52      |
| <i>n</i>                     | 25            | 48            |          | 101           | 61            |          | 53            | 13            |          |
| T1                           |               |               |          |               |               |          |               |               |          |
| Mean (SD)                    | –             | –             | –        | 13.14 (12.31) | 12.00 (13.25) | .50      | 18.06 (14.32) | 18.25 (18.26) | .64      |
| <i>n</i>                     | 0             | 0             |          | 91            | 59            |          | 48            | 12            |          |
| Gd                           |               |               |          |               |               |          |               |               |          |
| Mean (SD)                    | –             | –             | –        | 0.31 (0.96)   | 0.64 (3.82)   | .44      | 0.06 (0.24)   | 0 (0)         | .40      |
| <i>n</i>                     | 0             | 0             |          | 87            | 58            |          | 48            | 11            |          |
| Total volume of lesions (ml) |               |               |          |               |               |          |               |               |          |
| T2                           |               |               |          |               |               |          |               |               |          |
| Mean (SD)                    | 2.35 (3.44)   | 1.74 (2.10)   | .75      | 14.59 (17.83) | 11.52 (12.84) | .20      | 23.13 (20.93) | 22.58 (20.44) | .90      |
| <i>n</i>                     | 25            | 48            |          | 101           | 61            |          | 53            | 13            |          |
| T1                           |               |               |          |               |               |          |               |               |          |
| Mean (SD)                    | –             | –             | –        | 3.49 (8.18)   | 2.66 (4.52)   | .91      | 6.90 (9.31)   | 3.33 (3.79)   | .48      |
| <i>n</i>                     | 0             | 0             |          | 91            | 59            |          | 48            | 12            |          |
| Gd                           |               |               |          |               |               |          |               |               |          |
| Mean (SD)                    | –             | –             | –        | 0.047 (0.19)  | 0.08 (0.42)   | .45      | 0.005 (0.028) | 0 (0)         | .40      |
| <i>n</i>                     | 0             | 0             |          | 87            | 58            |          | 48            | 11            |          |

**Note:**—The differences between lesion volumes in subjects with and without CCSVI were calculated using the cube root of the total volume by applying the Student *t* test. The lesion volumes are expressed in ml. Gd indicates gadolinium.

**On-line Table 3: Global and regional atrophy measures according to CCSVI status in which CCSVI-borderline cases were classified in the CCSVI-negative group**

|           | HC             |               |          | RRMS          |                |          | SPMS          |               |          |
|-----------|----------------|---------------|----------|---------------|----------------|----------|---------------|---------------|----------|
|           | CCSVI          | No CCSVI      | <i>P</i> | CCSVI         | No CCSVI       | <i>P</i> | CCSVI         | No CCSVI      | <i>P</i> |
| NLVV (ml) |                |               |          |               |                |          |               |               |          |
| Mean (SD) | 28.64 (12.4)   | 26.71 (12.0)  | .47      | 39.7 (20.5)   | 36.4 (20.1)    | .14      | 53.2 (22.5)   | 47.8 (19.4)   | .45      |
| <i>n</i>  | 19             | 54            |          | 78            | 76             |          | 50            | 16            |          |
| TVW (mm)  |                |               |          |               |                |          |               |               |          |
| Mean (SD) | 2.47 (1.0)     | 2.65 (1.2)    | .61      | 3.72 (1.93)   | 4.02 (2.05)    | .51      | 5.38 (2.34)   | 4.77 (2.27)   | .39      |
| <i>n</i>  | 19             | 51            |          | 78            | 76             |          | 49            | 16            |          |
| NBV (ml)  |                |               |          |               |                |          |               |               |          |
| Mean (SD) | 1589.7 (104.1) | 1592.0 (97.7) | .99      | 1563.3 (95.6) | 1586.6 (115.9) | .19      | 1510.8 (99.5) | 1495.5 (79.6) | .28      |
| <i>n</i>  | 19             | 54            |          | 78            | 76             |          | 50            | 16            |          |
| NGMV (ml) |                |               |          |               |                |          |               |               |          |
| Mean (SD) | 837.4 (89.7)   | 828.2 (82.7)  | .67      | 805.4 (84.8)  | 810.3 (93.1)   | .82      | 751.7 (878.6) | 767.1 (808.7) | .75      |
| <i>n</i>  | 19             | 54            |          | 78            | 76             |          | 50            | 16            |          |
| NWMV (ml) |                |               |          |               |                |          |               |               |          |
| Mean (SD) | 752.3 (89.7)   | 763.8 (71.5)  | .41      | 75.8 (64.1)   | 77.6 (88.7)    | .35      | 759.1 (988.2) | 728.4 (704.2) | .24      |
| <i>n</i>  | 19             | 54            |          | 78            | 76             |          | 50            | 16            |          |
| NCV (ml)  |                |               |          |               |                |          |               |               |          |
| Mean (SD) | 687.8 (86.2)   | 691.2 (66.0)  | .96      | 645.1 (84.4)  | 642.8 (92.7)   | .67      | 595.9 (779.4) | 601.2 (758.5) | .85      |
| <i>n</i>  | 19             | 54            |          | 78            | 76             |          | 50            | 16            |          |

**Note:**—The differences between lesion volumes in subjects with and without CCSVI were calculated using the cube root of the volumes by applying the Student *t* test. The volumes are expressed in ml. Note that mm indicates millimeters; ml, milliliters; NBV, normalized brain volume; NCV, normalized cortical volume; NGMV, normalized gray matter volume; NLVV, normalized lateral ventricle volume; NWMV, normalized white matter volume; TVW, third ventricle width.

**On-line Table 4: Global and regional atrophy measures according to CCSVI status in which CCSVI-borderline cases were classified in the CCSVI-positive group**

|           | HC             |               |          | RRMS           |                |          | SPMS          |               |          |
|-----------|----------------|---------------|----------|----------------|----------------|----------|---------------|---------------|----------|
|           | CCSVI          | No CCSVI      | <i>P</i> | CCSVI          | No CCSVI       | <i>P</i> | CCSVI         | No CCSVI      | <i>P</i> |
| NLVV (ml) |                |               |          |                |                |          |               |               |          |
| Mean (SD) | 29.4 (11.5)    | 26.1 (12.3)   | .13      | 39.5 (21.4)    | 35.7 (18.1)    | .27      | 52.8 (22.7)   | 48.3 (18.1)   | .66      |
| <i>n</i>  | 25             | 48            |          | 96             | 58             |          | 53            | 13            |          |
| TVW (mm)  |                |               |          |                |                |          |               |               |          |
| Mean (SD) | 2.59 (1.07)    | 2.61 (1.24)   | .82      | 3.86 (2.09)    | 3.87 (1.83)    | .77      | 5.28          | 5.03 (2.30)   | .73      |
| <i>n</i>  | 25             | 48            |          | 96             | 58             |          | 52            | 13            |          |
| NBV (ml)  |                |               |          |                |                |          |               |               |          |
| Mean (SD) | 1564.9 (105.1) | 1605.1 (93.3) | .11      | 1562.2 (100.9) | 1595.8 (112.8) | .06      | 1512.1 (99.2) | 1486.6 (73.7) | .22      |
| <i>n</i>  | 25             | 48            |          | 96             | 58             |          | 53            | 13            |          |
| NGMV (ml) |                |               |          |                |                |          |               |               |          |
| Mean (SD) | 821.9 (85.8)   | 835.1 (83.6)  | .46      | 802.3 (87.5)   | 817.0 (90.8)   | .48      | 752.6 (85.9)  | 767.2 (88.3)  | .78      |
| <i>n</i>  | 25             | 48            |          | 96             | 58             |          | 53            | 13            |          |
| NWMV (ml) |                |               |          |                |                |          |               |               |          |
| Mean (SD) | 743.1 (82.0)   | 770.0 (72.1)  | .08      | 759.9 (700.1)  | 778.7 (879.2)  | .27      | 759.5 (96.8)  | 719.4 (70.8)  | .13      |
| <i>n</i>  | 25             | 48            |          | 96             | 58             |          | 53            | 13            |          |
| NCV (ml)  |                |               |          |                |                |          |               |               |          |
| Mean (SD) | 678.1 (79.8)   | 696.7 (66.2)  | .29      | 642.3 (900.6)  | 646.8 (874.3)  | .92      | 596.7 (76.1)  | 599.1 (83.4)  | .93      |
| <i>n</i>  | 25             | 48            |          | 96             | 58             |          | 53            | 13            |          |

**Note:**—The differences between lesion volumes in subjects with and without CCSVI were calculated using the cube root of the volumes by applying the Student *t* test. The volumes are expressed in ml. Note that mm indicates millimeters; ml, milliliters; NBV, normalized brain volume; NCV, normalized cortical volume; NGMV, normalized gray matter volume; NLVV, normalized lateral ventricle volume; NWMV, normalized white matter volume; TVW, third ventricle width.
